# Supplementary material for: Which factors are associated with COVID-19 infection incidence in care services for older people in Nordic countries? A cross-sectional survey
Source: Scand J Public Health. 2022 May 12;50(6):787–94. doi: 10.1177/14034948221085398 (PMC9361421; doi:10.1177/14034948221085398)
Supplement: sj-xls-1-sjp-10.1177_14034948221085398 – Supplemental material for Which factors are associated with COVID-19 infection incidence in care services for older people in Nordic countries? A cross-sectional survey [file sj-xls-1-sjp-10.1177_14034948221085398.xls]

## Sheet: Suppl. Table 1
	Supplementary Table 1. Preventive measures and methods for mitigating on-site client COVID-19 outbreak, Phase 2 (March 16 - April 30, 2020).
												Client C-19
	Variable			Denmark		Finland		Norway		Sweden
	Preventive Measures			n	(%)	n	(%)	n	(%)	n	(%)	Corr
	1. Visit / exit restrictions***
			Yes of Total	'602/710	(84.8)	'215/235	(91.5)	'217/231	(93.9)	'212/279	(76.0)	.00
	2. Employee use of personal protective equipment***
			Yes of Total	'662/716	(92.5)	'230/233	(98.7)	'191/229	(83.4)	'272/289	(94.1)	.04
	3. Client use of personal protective equipment***
			Yes of Total	'405/695	(58.3)	'96/227	(42.3)	'61/222	(27.5)	'68/270	(25.2)	.03
	4. Client restrictions on freedom of movement***
			Yes of Total	'448/673	(66.6)	'155/233	(66.5)	'153/230	(66.5)	'182/270	(67.4)	.05
	5. Changes to clients' meals
			Yes of Total	'414/651	(63.6)	'152/229	(66.4)	'142/226	(62.8)	'155/258	(60.1)	.04
	6. Organization of employee groups into smaller units
			Yes of Total	'576/711	(81.0)	'182/234	(77.8)	'181/231	(78.4)	'215/280	(76.8)	.08**
	7. Changes in use of temporary staff*
			Yes of Total	'546/705	(77.4)	'174/235	(74.0)	'181/233	(77.7)	'194/283	(68.6)	.03
	8. Organization of care to ensure each client has as few contacts as possible
			Yes of Total	'617/712	(86.7)	'188/236	(79.7)	'193/230	(83.9)	'237/287	(82.6)	.07*
	9. Training of employees in proper hygiene and use of protective equipment
			Yes of Total	'707/720	(98.2)	'237/239	(99.2)	'232/233	(99.6)	'284/288	(98.6)	.01
	10. Regular employee COVID-19 testing*
			Yes of Total	'41/715	(5.7)	'5/236	(2.1)	'10/233	(4.3)	'22/286	(7.7)	.08**
	11. Regular client COVID-19 testing*
			Yes of Total	'27/701	(3.9)	'4/235	(1.7)	'7/233	(3.0)	'21/272	(7.7)	.11**
	12. Greater focus on cleaning
			Yes of Total	'713/720	(99.0)	'232/236	(98.3)	'230/232	(99.1)	'281/284	(98.9)	.01
	13. Service limitations***
			Yes of Total	'650/708	(91.8)	'218/235	(92.8)	'222/233	(95.3)	'243/283	(85.9)	.02
	14. COVID-19 testing of all new clients***
			Yes of Total	'211/692	(30.5)	'56/234	(23.9)	'42/231	(18.2)	'130/278	(46.8)	.07*
	15. COVID-19 testing of all clients discharged from hospital***
			Yes of Total	'384/695	(55.3)	'56/229	(24.5)	'105/226	(46.5)	'185/278	(66.5)	.04
	16. Isolation of clients on return from hospital***
			Yes of Total	'206/690	(29.9)	'109/229	(47.6)	'45/227	(19.8)	'165/271	(60.9)	.06*
	17. Increased requirements for personal precautions for employees outside work***
			Yes of Total	'335/712	(47.1)	'115/233	(49.4)	'177/233	(76.0)	'165/285	(57.9)	-.01
	Methods for mitigating client COVID-19 outbreak; only units with cases
	1. Isolation of infected client(s)***
			Yes of Total	'110/198	(55.6)	'18/26	(69.2)	'21/41	(51.2)	'78/131	(59.5)	.21**
	2. Internal transfer of infected client(s) to on-site special ward***
			Yes of Total	'16/196	(8.2)	'4/26	(15.4)	'5/39	(12.8)	'12/130	(9.2)	.20**
	3. External transfer of infected client(s) to off-site special ward, e.g., in municipality***
			Yes of Total	'27/192	(14.1)	'1/26	(3.8)	'9/41	(22.0)	'10/128	(7.8)	-.01
	4. Employees without COVID-19 symptoms allowed to return home***
			Yes of Total	'125/197	(63.5)	'10/26	(38.5)	'19/41	(46.3)	'18/118	(15.3)	-.03
	5. Mapping and tracing of infection chains***
			Yes of Total	'104/195	(53.3)	'22/26	(84.6)	'27/41	(65.9)	'64/129	(49.6)	-.00
	6. Greater focus on hygiene and proper use of protective equipment***
			Yes of Total	'191/198	(96.5)	'23/26	(88.5)	'36/41	(87.8)	'120/132	(90.9)	.04
	7. Regular employee COVID-19 testing**
			Yes of Total	'12/196	(6.1)	'3/26	(11.5)	'3/41	(7.3)	'9/129	(7.0)	.05
	8. Regular client COVID-19 testing**
			Yes of Total	'13/195	(6.7)	'2/26	(7.7)	'3/41	(7.3)	'10/127	(7.9)	.07
	9. Greater focus on cleaning areas, surfaces and objects that an infected has touched***
			Yes of Total	'168/196	(85.7)	'19/26	(73.1)	'33/41	(80.5)	'108/129	(83.7)	.10
	10. Establishment of employee team for infected/suspected to be infected clients***
			Yes of Total	'104/197	(52.8)	'16/26	(61.5)	'27/41	(65.9)	'56/129	(43.4)	.09
	11. Sectioning/zoning to ensure limited activity and movement across zones***
			Yes of Total	'123/196	(62.8)	'20/26	(76.9)	'33/40	(82.5)	'64/127	(50.4)	.06
	12. Same employees attached to isolated sections/wards***
			Yes of Total	'80/190	(42.1)	'18/26	(69.2)	'23/40	(57.5)	'72/131	(55.0)	.14**
	Data reported in numbers percent and correlation coefficient; *p≤0.05, **p≤0.01, ***p≤0.001; Client C-19 = Number of COVID-19 cases per residential/home unit; Corr = Pearson's correlation coefficient; In variables with range of difference (%) between countries is >15%, (%)=min., (%)=max.; All data from survey. Inter-country differences tested with Chi-squared test.
